# Supplementary material for: Every cloud has a silver lining: how abiotic stresses affect gene expression in plant-pathogen interactions
Source: PubMed Central journal article supplement (PMC7904152; doi:10.1093/jxb/eraa531), 2020-11-14
Supplement: eraa531_suppl_supplementary_table_s1.pdf [file eraa531_suppl_supplementary_table_s1.pdf]

Table S1. List of Arabidopsis genes mentioned in the review.

| Abbreviation | Gene Number | Gene name                                        | Known or putative function             |
|--------------|-------------|--------------------------------------------------|----------------------------------------|
| AOC2         | AT3G25770   | <i>Allene oxide cyclase 2</i>                    | allene oxide cyclase                   |
| CBP60g       | AT5G26920   | <i>Calmodulin binding protein 60-like.g</i>      | Transcription factor                   |
| DDE2         | AT5G42650   | <i>Delayed Dehiscence 2</i>                      | allene oxide synthase                  |
| DMR6         | AT5G24530   | <i>Downy mildew resistant 6</i>                  | flavone synthase/SA hydroxylase        |
| EDS1         | AT3G48090   | <i>Enhanced Disease Susceptibility 1</i>         | Lipase                                 |
| EIN3         | AT3G20770   | <i>Ethylene-Insensitive 3</i>                    | Transcription factor                   |
| FRK1         | AT2G19190   | <i>Flg22-Induced Receptor-Like Kinase 1</i>      | Receptor kinase                        |
| HAK5         | AT4G13420   | <i>High Affinity K<sup>+</sup> Transporter 5</i> | K transporter                          |
| HSFA1        | AT4G17750   | <i>Heat Shock Factor 1a</i>                      | Transcription factor                   |
| ICS1         | AT1G74710   | <i>Isochorismate synthase 1</i>                  | Isochorismate synthase/Sa biosynthesis |
| JAZ1         | AT1G19180   | <i>Jasmonate-Zim-Domain Protein 1</i>            | JA signalling                          |
| JAZ5         | AT1G17380   | <i>Jasmonate-Zim-Domain Protein 5</i>            | JA signalling                          |
| JAZ6         | AT1G72450   | <i>Jasmonate-Zim-Domain Protein 6</i>            | JA signalling                          |
| JAZ7         | AT2G34600   | <i>Jasmonate-Zim-Domain Protein 7</i>            | JA signalling                          |
| JAZ9         | AT1G70700   | <i>Jasmonate-Zim-Domain Protein 9</i>            | JA signalling                          |
| LOX1         | AT1G55020   | <i>Lipoxygenase 1</i>                            | Lipoxygenase                           |
| LOX3         | AT1G17420   | <i>Lipoxygenase 3</i>                            | Lipoxygenase                           |
| MYC2         | AT1G32640   | <i>Myelocytomatosis oncogenes 2</i>              | transcription factor                   |
| MYC3         | AT5G46760   | <i>Myelocytomatosis oncogenes 3</i>              | transcription factor                   |
| MYC4         | AT4G17880   | <i>Myelocytomatosis oncogenes 4</i>              | transcription factor                   |
| NAC019       | AT1G52890   | <i>NAM/ATAF/CUC 19</i>                           | transcription factor                   |
| NAC042       | AT2G43000   | <i>NAM/ATAF/CUC 42</i>                           | transcription factor                   |
| NAC053       | AT3G10500   | <i>NAM/ATAF/CUC 53</i>                           | transcription factor                   |
| NAC055       | AT3G15500   | <i>NAM/ATAF/CUC 55</i>                           | transcription factor                   |
| NAC072       | AT4G27410   | <i>NAM/ATAF/CUC 72</i>                           | transcription factor                   |
| NAC092       | AT5G39610   | <i>NAM/ATAF/CUC 92</i>                           | transcription factor                   |
| NPR1         | AT1G64280   | <i>Non pathogenesis related 1</i>                | Regulator protein                      |
| PAD4         | AT3G52430   | <i>Phytoalexin Deficient 4</i>                   | Lipase-like                            |
| PBS3         | AT5G13320   | <i>avrP-phB SUSCEPTIBLE 3</i>                    | acyl adenylase                         |
| PHR1         | AT4G28610   | <i>Phosphate Starvation Response 1</i>           | transcription factor                   |
| PDF1.2a      | AT5G44420   | <i>Plant Defensin 1.2a</i>                       | Antimicrobial peptide                  |
| PR1          | AT2G14610   | <i>Pathogenesis related 1</i>                    | Extracellular protein                  |
| PR2          | AT3G57260   | <i>Pathogenesis related 2</i>                    | $\beta$ -1,3-Glucanase                 |
| PR3          | AT3G12500   | <i>Pathogenesis related 3</i>                    | Basic Chitinase                        |
| PR4          | AT3G04720   | <i>Pathogenesis related 4</i>                    | Hevein-like                            |
| PR5          | AT1G75040   | <i>Pathogenesis related 5</i>                    | Extracellular protein, thaumatin-like  |
| SARD1        | AT1G73805   | <i>Sar Deficient 1</i>                           | transcription factor                   |
| SIF4         | AT1G51820   | <i>Stress Induced Factor 4</i>                   | Leucine-rich repeat protein kinase     |
| VSP1         | AT5G24780   | <i>Vegetative Storage Protein 1</i>              | Acid phosphatase                       |
| WRKY18       | AT4G31800   | <i>WRKY DNA-Binding Protein 18</i>               | transcription factor                   |
| WRKY22       | AT4G01250   | <i>WRKY DNA-Binding Protein 22</i>               | transcription factor                   |
| WRKY28       | AT4G18170   | <i>WRKY DNA-Binding Protein 28</i>               | transcription factor                   |
| WRKY29       | AT4G23550   | <i>WRKY DNA-Binding Protein 29</i>               | transcription factor                   |
| WRKY30       | AT5G24110   | <i>WRKY DNA-Binding Protein 30</i>               | transcription factor                   |
| WRKY38       | AT5G22570   | <i>WRKY DNA-Binding Protein 38</i>               | transcription factor                   |
| WRKY46       | AT2G46400   | <i>WRKY DNA-Binding Protein 46</i>               | transcription factor                   |
| WRKY50       | AT5G26170   | <i>WRKY DNA-Binding Protein 50</i>               | transcription factor                   |
| WRKY53       | AT4G23810   | <i>WRKY DNA-Binding Protein 53</i>               | transcription factor                   |
| WRKY70       | AT3G56400   | <i>WRKY DNA-Binding Protein 70</i>               | transcription factor                   |
